# Supplementary material for: Low-temperature synthesis of NaRE(WO4)2 films via anion exchange from layered rare-earth hydroxides (LRHs) films, phase/morphology evolution and photoluminescence
Source: Royal Society of Chemistry journal article supplement (doi:10.1039/d2ce00950a), 2022-01-01
Supplement: d2ce00950a1.pdf [file d2ce00950a1.pdf]

## **Low-temperature synthesis of NaRE(WO<sub>4</sub>)<sub>2</sub> films via sacrificial conversion from the layered rare-earth hydroxides, phase/morphology evolution, and photoluminescence**

**Xiaoli Wu<sup>1,2,3\*</sup>, Haocheng Dong<sup>1</sup>, Sen Qin<sup>1</sup>, Yongping Guo<sup>1</sup>**

1 College of Materials Science and Engineering, Guilin University of Technology, Guilin 541004, P. R. China;

2 Guangxi Key Laboratory of Optical and Electronic Materials and Devices, Guilin University of Technology, Guilin 541004, China;

3 Collaborative Innovation Center for Exploration of Nonferrous Metal Deposits and Efficient Utilization of Resources in Guangxi; Guilin University of Technology, Guilin 541004, China;

\*Corresponding author

E-mail address: wuxiaoli@glut.edu.cn

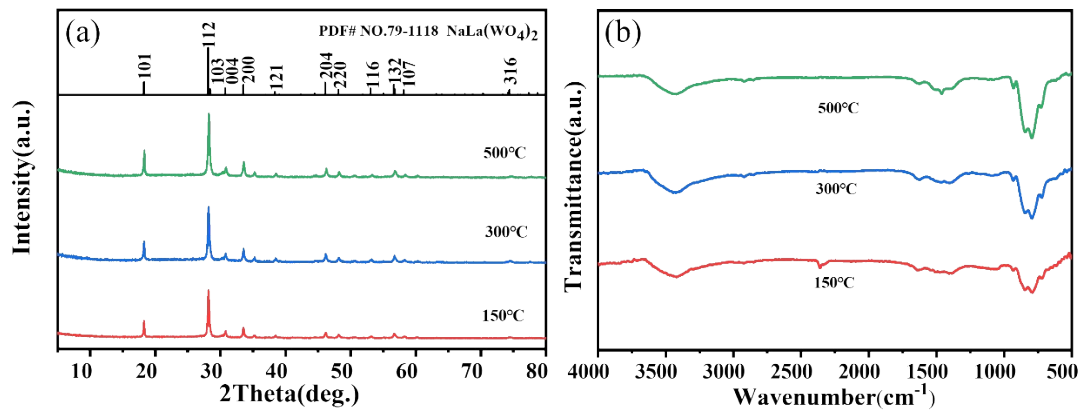

**Fig. S1** XRD patterns (a) and FT-IR spectra (b) of NaLa(WO<sub>4</sub>)<sub>2</sub> films obtained via further heat treatment at 150 °C, 300 °C, and 500 °C.

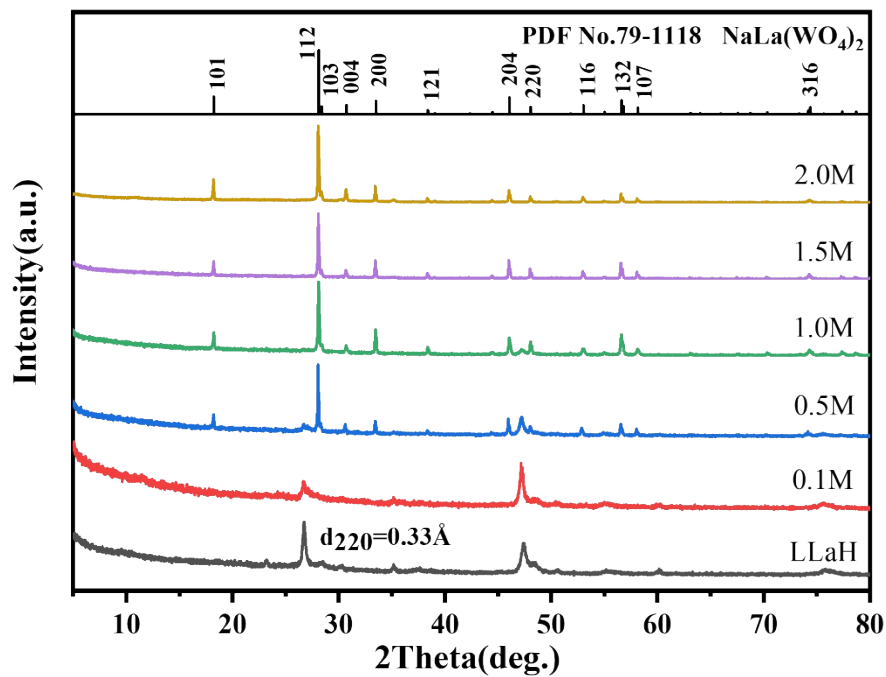

**Fig. S2** XRD patterns of anion exchanged films prepared with different concentration of Na<sub>2</sub>WO<sub>4</sub> solutions at 100 °C.

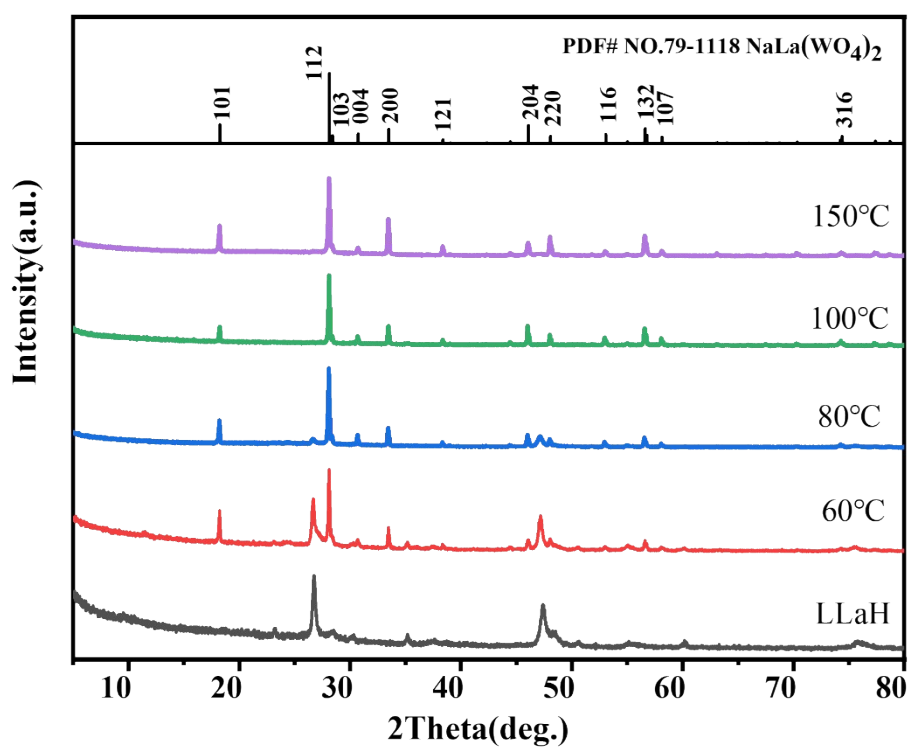

**Fig. S3** XRD patterns of anion exchanged films synthesized prepared with 1.5M  $\text{Na}_2\text{WO}_4$  solutions at different temperatures.

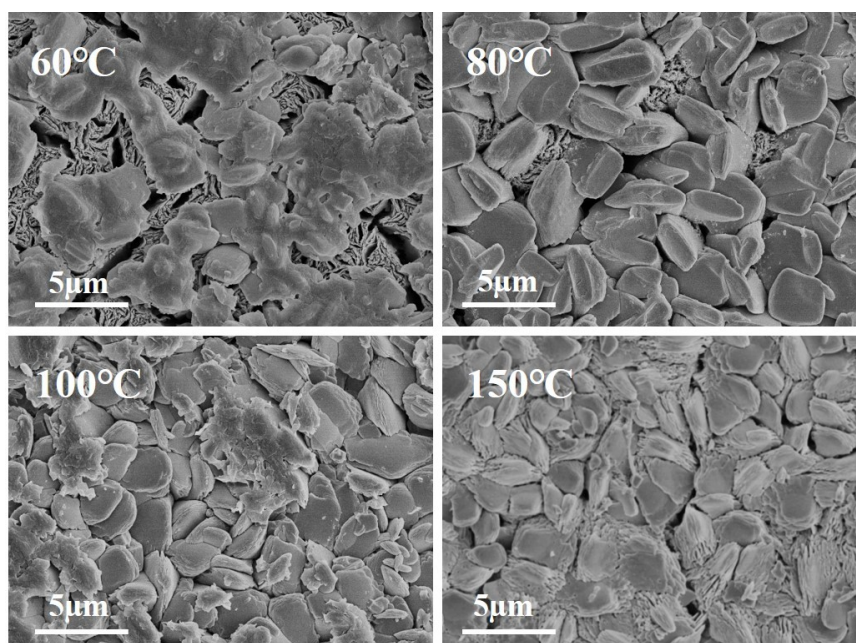

**Fig. S4** SEM morphologies of anion exchanged films synthesized prepared with 1.5M  $\text{Na}_2\text{WO}_4$  solutions at different temperatures.

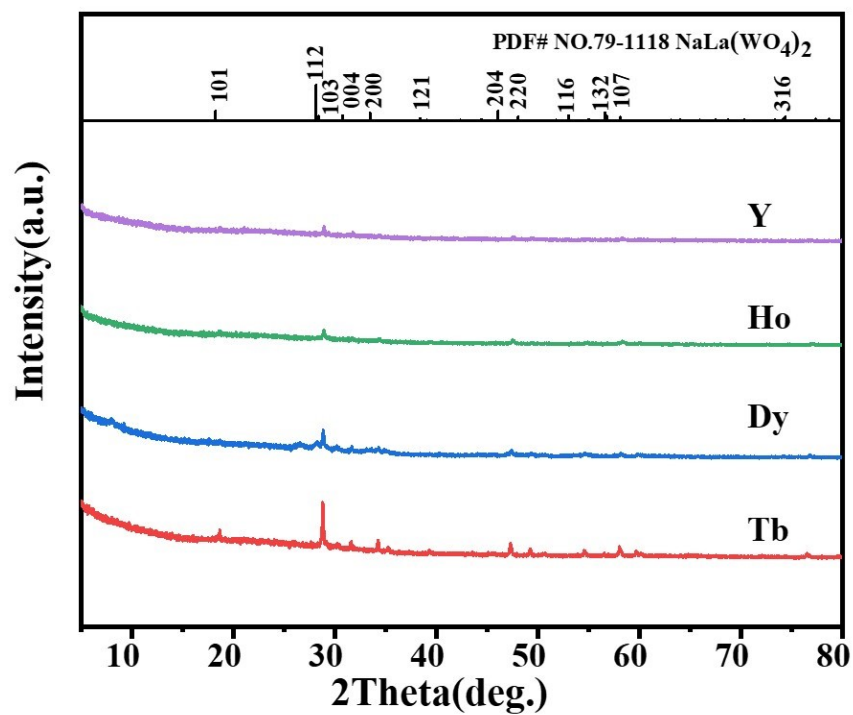

**Fig. S5** XRD patterns of the  $\text{NaRE}(\text{WO}_4)_2$  (RE=Tb, Dy, Ho and Y) films prepared with 2M  $\text{Na}_2\text{WO}_4$  solution at 100 °C for 6h.

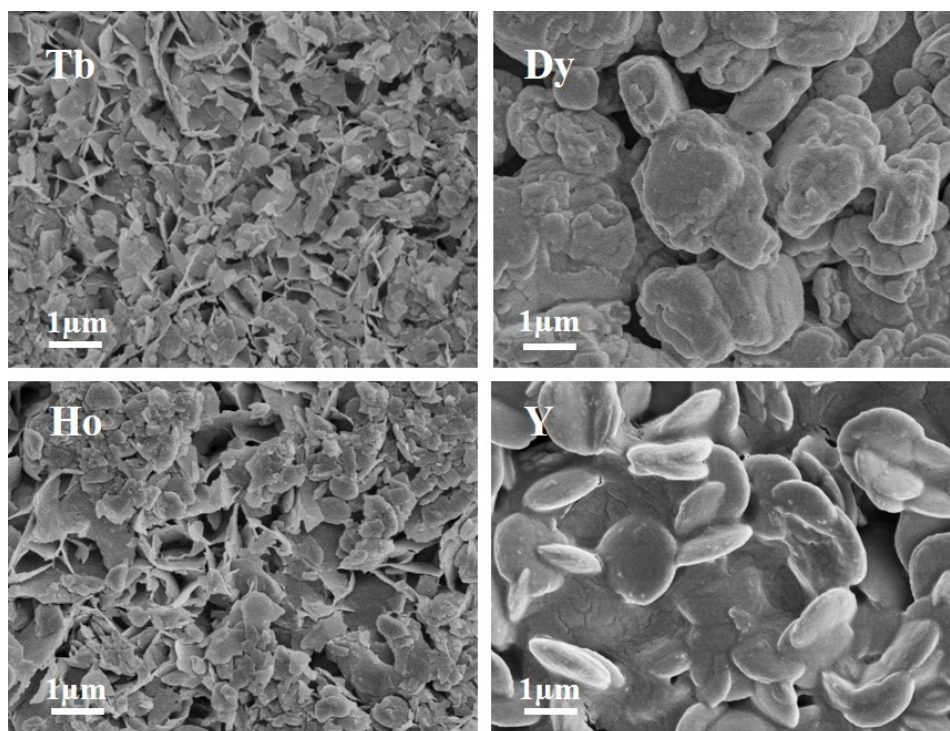

**Fig. S6** FE-SEM images of the  $\text{NaRE}(\text{WO}_4)_2$  (RE=Tb, Dy, Ho and Y) films prepared with 2M  $\text{Na}_2\text{WO}_4$  solution at 100 °C for 6h.
